# Supplementary material
Source: Royal Society of Chemistry journal article supplement (https://www.rsc.org/suppdata/cc/1999/1661/904254g.doc)
Supplement: Supplementary file 1 [file 904254g.doc]

**Supplementary Information**

**Novel Columnar Mesogen with Octupolar Optical Nonlinearities: Synthesis, Mesogenic Behavior and Multiphoton-Fluorescence-Free Hyperpolarizabilities of Subphthalocyanines with Long Aliphatic Chains**

**Seok Ho Kang,a Yoon-Sok Kang,b Wang-Cheol Zin,b Geert Olbrechts,c Kurt Wostyn,c Koen Clays,c,* Andre Persoons,c Kimoon Kima,***

*aNational Creative Research Initiative Center for Smart Supramolecules, aDepartment of Chemistry, and bDepartment of Materials Science and Engineering, Pohang University of Science and Technology, San 31 Hyojadong, Pohang 790-784, South Korea, cLaboratory of Chemical and Biochemical Dynamics, Center for Research on Molecular Electronics and Photonics, Department of Chemistry University of Leuven, Celestijnenlaan 200D, B-3001 Leuven, Belgium.*

**Experimental**

**2a**: Compound **1a** (2.13 g, 4.50 mmol) was dissolved in 1-chloronaphthalene (4 mL) under Ar. After cooling of the solution in an ice bath a solution of BCl3 (1.5 mL, 1.5 mmol, 1 M solution in *n*-heptane) was added. The mixture was stirred at 0 ∞C for 10 min and then heated to 100 ∞C for 4 h. After cooling to room temperature, the mixture was diluted with acetone. The crude product was isolated by filtration and purified by column chromatography on silica gel using CH2Cl2 as eluent (0.30 g, 14 %). H (CDCl3, 300 MHz) 0.88 (t, 18H), 1.59 (m, 84H), 1.89 (m, 12H), 3.31 (m, 12H), 8.51 (s, 6H); C (CDCl3, 75 MHz) 14.52, 23.09, 28.86, 29.56, 29.72, 29.74, 29.96, 30.01, 32.31, 34.08, 119.91, 128.69, 141.23, 149.53; max(KBr)/cm-1 2955, 2924, 2853, 2360, 2342, 1597, 1462, 1419, 1368, 1080, 979; UV-vis (CHCl3): max (log ) = 602 (5.00), 558 (4.50), 415 (4.53), 389 (4.52), 306 (4.85) nm; Fluorescence (excitation was at 360 nm, CHCl3): max = 613, 504 nm; *m*/*z* (FAB) 1463 [M+H]+; Calcd for C84H132 BClN6S6: C, 68.88; H, 9.08; N, 5.74. Found: C, 68.48; H, 9.18; N, 5.48.

**2b**: This was prepared from **1b** (1.59 g, 3.0 mmol) and BCl3 (1.0 mL, 1.0 mmol, 1 M solution in *n*-heptane) by the same method as in **2a** (0.18 g, 11%). H (CDCl3, 300 MHz) 0.87 (t, 18H), 1.62 (m, 108H), 1.90 (m, 12H), 3.33 (m, 12H), 8.59 (s, 6H); C (CDCl3, 300 MHz) 14.54, 23.11, 28.84, 29.56, 29.72, 29.78, 29.97, 30.07, 30.10, 32.33, 34.07, 119.91, 128.74, 141.26, 149.58; max(KBr)/cm-1 2955, 2924, 2853, 1598, 1463, 1369, 1226, 1082, 978; UV-vis (CHCl3): max (log ) = 603 (4.99), 557 (4.50), 413 (4.49), 388 (4.48), 307(4.83) nm; Fluorescence (excitation was at 360 nm, CHCl3): max = 611, 508 nm; *m*/*z* (FAB) 1631 [M+H]+; Calcd for C96H156BClN6S6: C, 70.61; H, 9.62; N, 5.15. Found: C, 70.58; H, 9.64; N, 4.93.

**2c**: This was prepared from **1c** (2.89 g, 4.50 mmol) and BCl3 (1.5 mL, 1.5 mmol, 1 M solution in *n*-heptane) by the same method as in **2a** (0.68 g, 23%). H (CDCl3, 300 MHz) 0.88 (t, 18H), 1.66 (m, 156H), 1.90 (m, 12H), 3.31 (m, 12H), 8.52 (s, 6H); C (CDCl3, 300 MHz) 14.54, 23.11, 28.87, 29.58, 29.75, 29.79, 29.99, 30.09, 30.13, 32.34, 34.08, 119.90, 128.70, 141.25, 149.53; max(KBr)/cm-1 2955, 2923, 1732, 1598, 1463, 1369, 1240, 1185, 1081, 979; UV-vis (CHCl3): max (log ) = 602 (5.19), 559 (4.92), 413 (4.85), 388 (4.84), 304 (5.08) nm; Fluorescence (excitation was at 360 nm, CHCl3): max = 612, 506 nm; *m*/*z* (FAB) 1968 [M+H]+; Calcd for C120H204BClN6S6: C, 73.18; H, 10.44; N, 4.27. Found: C, 73.42; H, 10.54; N, 4.41.

**2d**: This was prepared from **1d** (1.46 g, 2.1 mmol) and BCl3 (0.7 mL, 0.7 mmol, 1 M solution in *n*-heptane) by the same method as in **2a** (0.11 g, 7%). H (CDCl3, 300 MHz) 0.87 (t, 18H), 1.22 (m, 180H), 1.90 (m, 12H), 3.30 (m, 12H), 8.60 (s, 6H); C (CDCl3, 300 MHz) 14.50, 23.09, 28.89, 29.56, 29.76, 29.98, 30.11, 32.33, 34.12, 120.03, 128.77, 141.33, 149.55; max(KBr)/cm-1 2955, 2923, 1732, 1598, 1463, 1369, 1240, 1185, 1081, 979; UV-vis (CHCl3): max (log ) = 602 (4.70), 558 (4.18), 415 (4.24), 386 (4.18), 307 (4.56) nm; Fluorescence (excitation was at 360 nm, CHCl3): max = 612, 506 nm; *m*/*z* (FAB) 2138 [M+H]+; Calcd for C132H228BClN6S6: C, 74.16; H, 10.75; N, 3.93. Found: C, 74.19; H, 10.88; N, 3.85.
